# Supplementary material for: Self-generated hollow NaTi2(PO4)3 nanocubes decorated with graphene as a large capacity and long lifetime anode for sodium-ion batteries
Source: Royal Society of Chemistry journal article supplement (doi:10.1039/c7ra12291h), 2017-01-01
Supplement: c7ra12291h1.pdf [file c7ra12291h1.pdf]

## Supporting Information for

### Self-generated Hollow $\text{NaTi}_2(\text{PO}_4)_3$ Nanocubes Decorated with Graphene as a Large Capacity and Long Lifetime Anode for Sodium-ion Batteries

Shaocheng Ye<sup>a</sup>, Zhihong Li<sup>a</sup>, Tianbing Song<sup>a</sup>, Danhong Cheng<sup>a</sup>,

Qunjie Xu<sup>a</sup>, Haimei Liu<sup>a</sup>, Yonggang Wang<sup>b</sup>

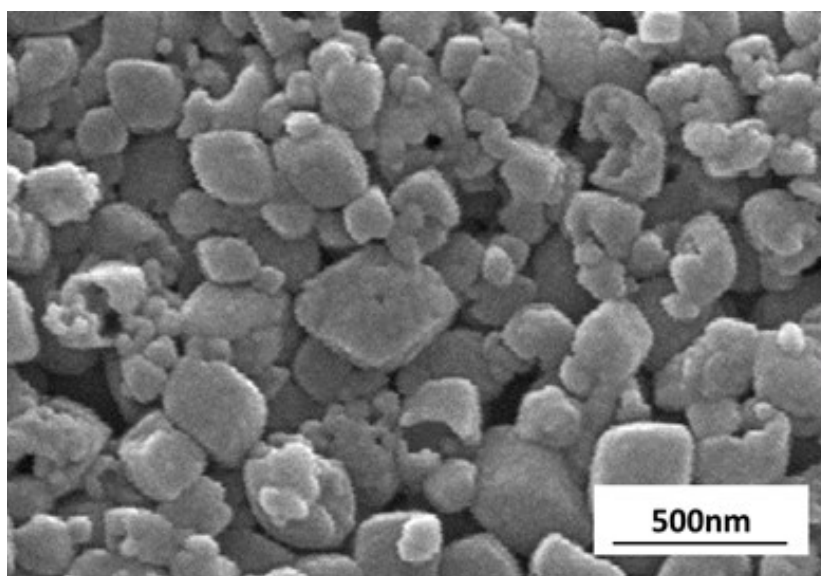

**Fig.S1. SEM images of pure  $\text{NaTi}_2(\text{PO}_4)_3$  with hydrothermal time of 9hs.**

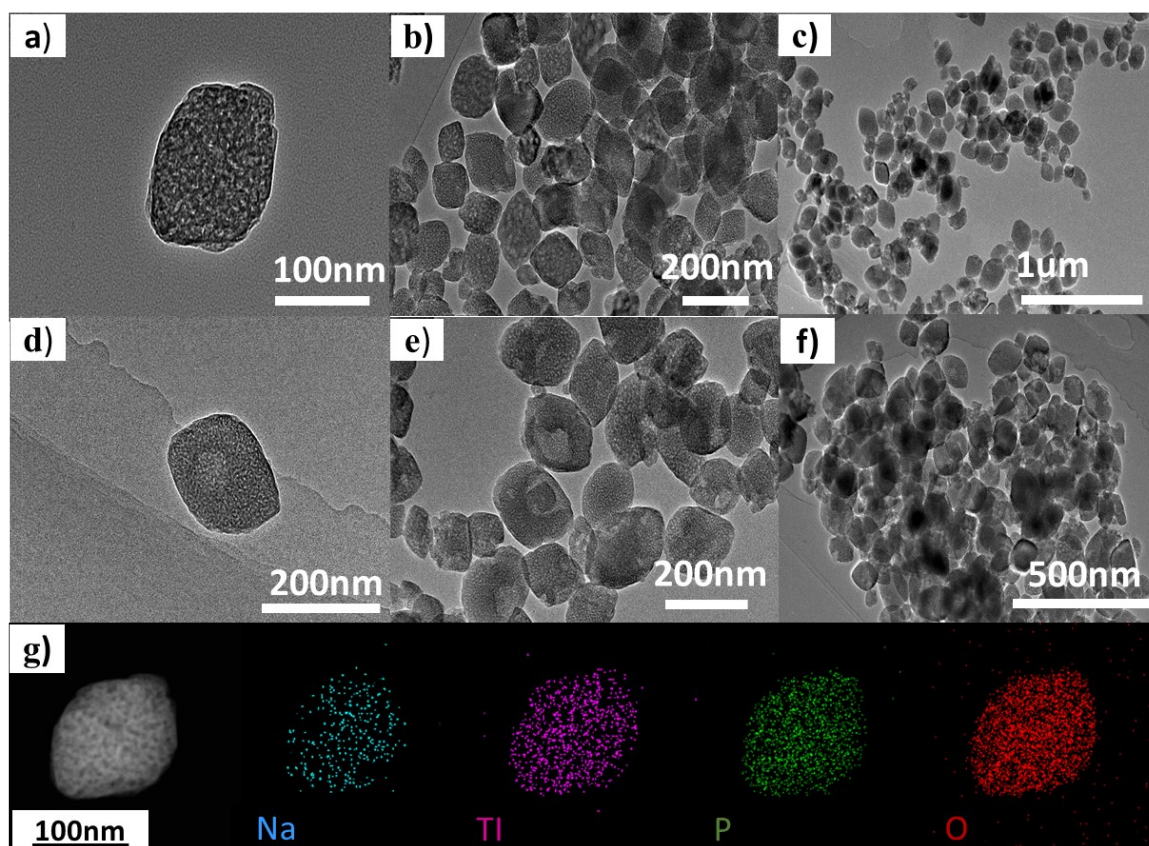

**Fig.S2.** a, b, c) TEM images of  $\text{NaTi}_2(\text{PO}_4)_3$  1h; d, e, f) showing the  $\text{NaTi}_2(\text{PO}_4)_3$  6h; g)TEM image of  $\text{NaTi}_2(\text{PO}_4)_3$  1h and the corresponding EDX mapping of Na (blue), Ti(purlish red), P (green), O (red).

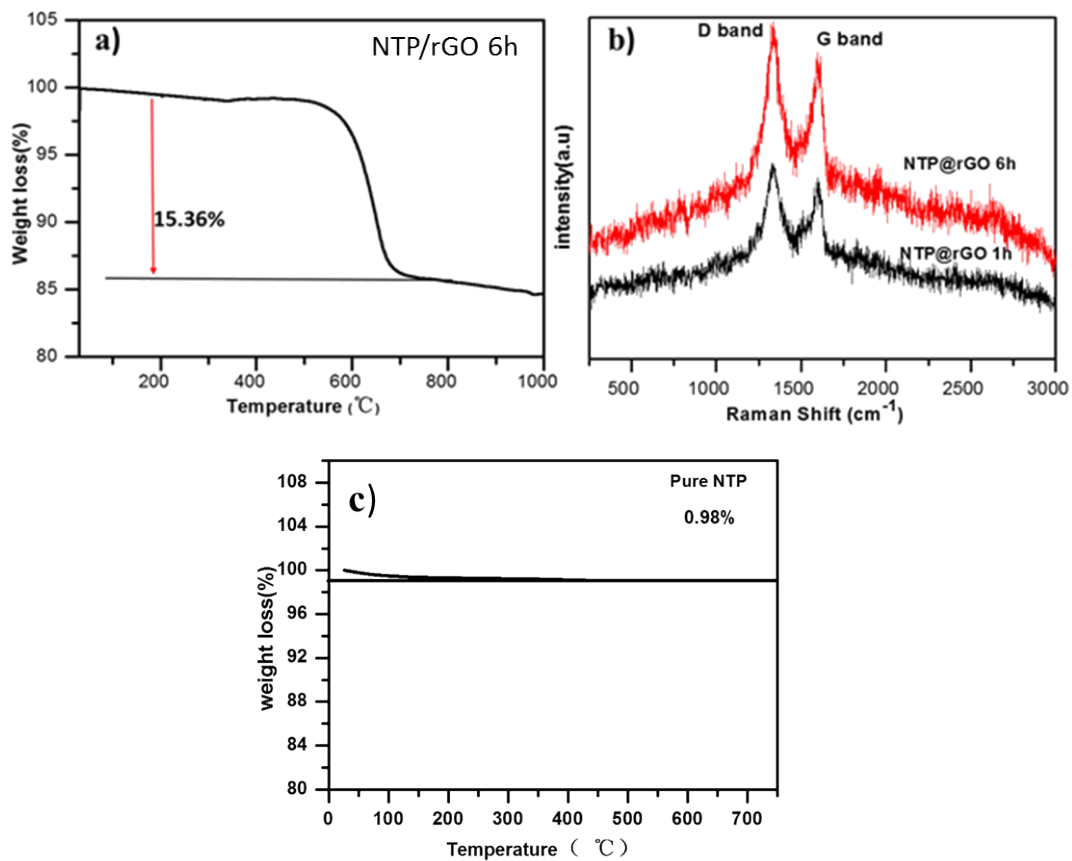

**Fig. S3.** a) The TG curve of the NaTi<sub>2</sub>(PO<sub>4</sub>)<sub>3</sub>@rGO 6h sample ; b) Raman spectra of the NaTi<sub>2</sub>(PO<sub>4</sub>)<sub>3</sub>/rGO 1h and NaTi<sub>2</sub>(PO<sub>4</sub>)<sub>3</sub>/rGO 6h composites; c) The TG curve of the pure NaTi<sub>2</sub>(PO<sub>4</sub>)<sub>3</sub> sample.

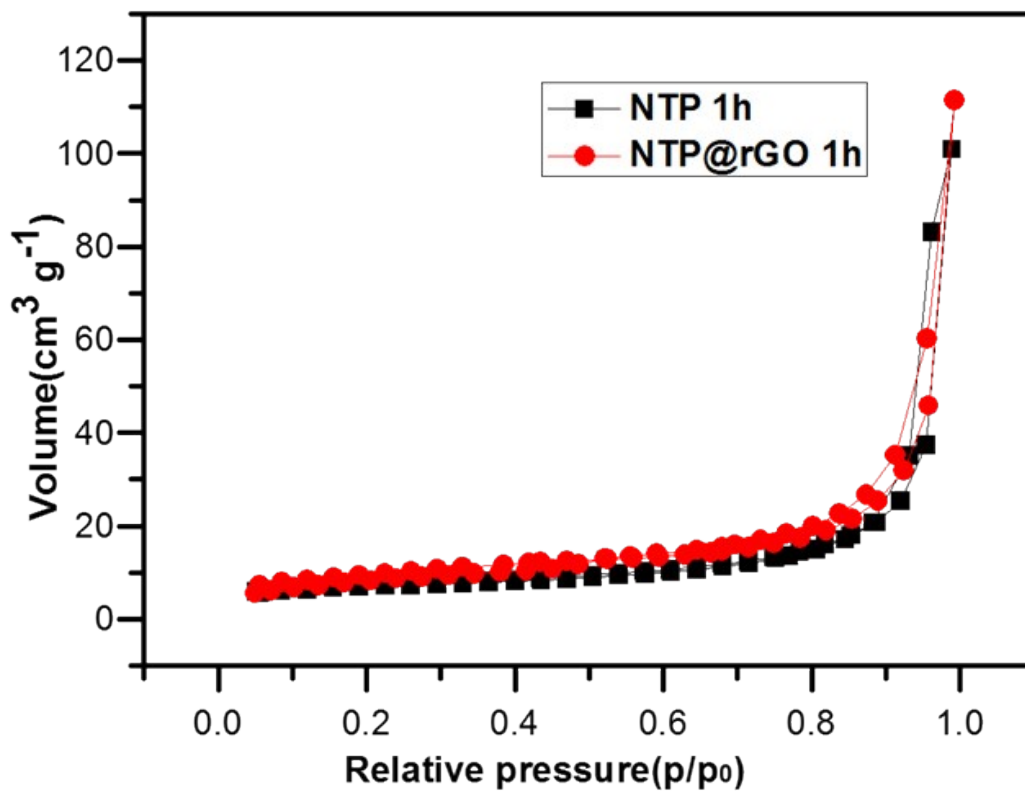

**Fig.S4.** a) N<sub>2</sub> absorption–desorption isotherms of the NaTi<sub>2</sub>(PO<sub>4</sub>)<sub>3</sub> 1h and NaTi<sub>2</sub>(PO<sub>4</sub>)<sub>3</sub>/rGO 1h.

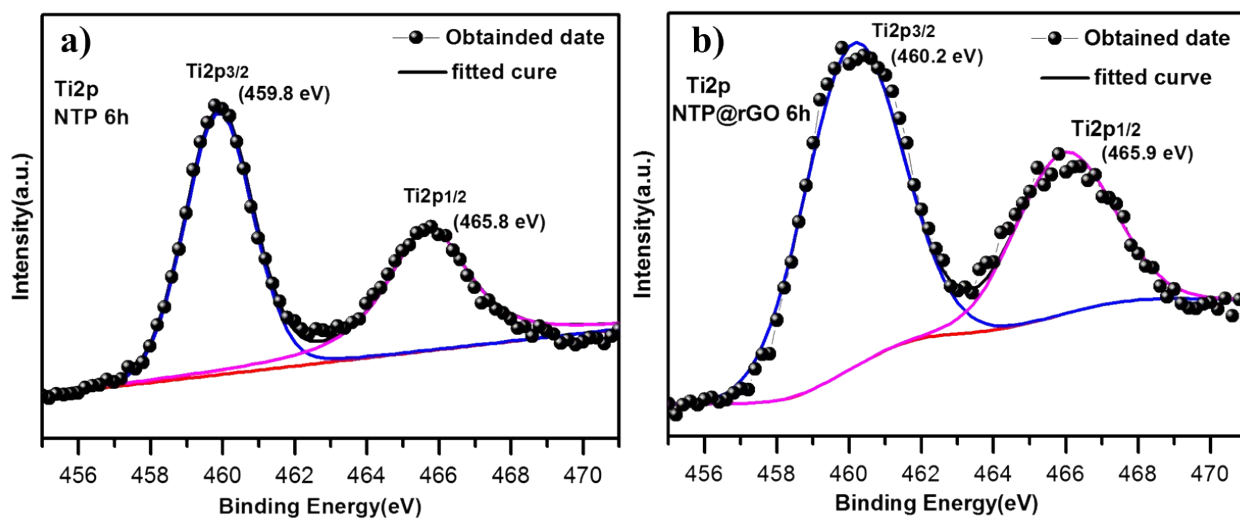

**Fig.S5.** a) XPS survey spectra of the NaTi<sub>2</sub>(PO<sub>4</sub>)<sub>3</sub> 6h and NaTi<sub>2</sub>(PO<sub>4</sub>)<sub>3</sub>@rGO 6h; a, b) Deconvoluted Ti2p peaks of the NaTi<sub>2</sub>(PO<sub>4</sub>)<sub>3</sub> 6h and the NaTi<sub>2</sub>(PO<sub>4</sub>)<sub>3</sub>@rGO 6h composite.

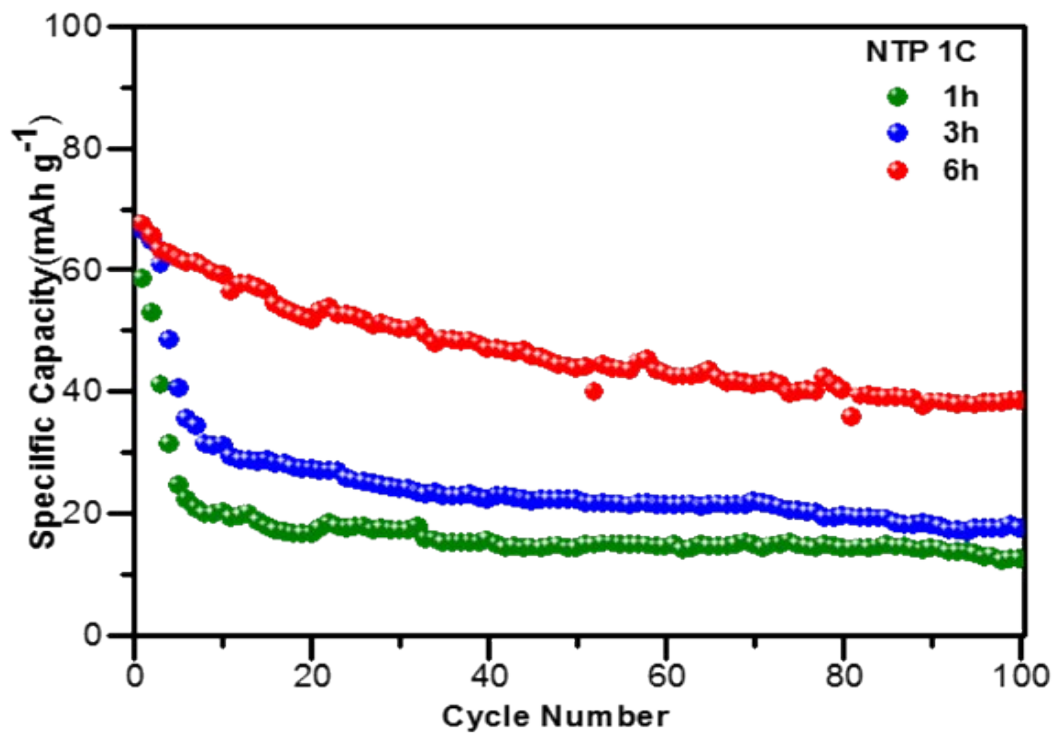

**Fig.S6.** Cycling performance at 1C of pure NaTi<sub>2</sub>(PO<sub>4</sub>)<sub>3</sub> prepared with hydrothermal times of 1h,3h, and 6h .

**Table S1.** Comparison of electrochemical performance of different NTP materials

| Electrode definition                                                                         | Specific capacity (mAh g <sup>-1</sup> ) | Cycle performance                                | References       |
|----------------------------------------------------------------------------------------------|------------------------------------------|--------------------------------------------------|------------------|
| H-NTP NC@rGO                                                                                 | 128mAh g <sup>-1</sup> at 1C             | 120mAh g <sup>-1</sup> after 150 cycles at 1C    | <b>This work</b> |
|                                                                                              | 118 mAh g <sup>-1</sup> at 3C            | 103mAh g <sup>-1</sup> after 500 cycles at 3C    |                  |
| High rate performance of NTP@rGO                                                             | 112 mAh g <sup>-1</sup> at 1C            | 100 mAh g <sup>-1</sup> after 150 cycles at 1C   | S1               |
| Porous NTP@rGO                                                                               | 138 mAh g <sup>-1</sup> at 1C            | 101 mAh g <sup>-1</sup> after 200 cycles at 1C   | S2               |
| Self-assembled wafer-like porous NTP decorated with hierarchical carbon                      | 114mAh g <sup>-1</sup> at 2C             | 92 mAh g <sup>-1</sup> after 300 cycles at 2C    | S3               |
| Facile solvothermal synthesis of NaTi <sub>2</sub> (PO <sub>4</sub> ) <sub>3</sub> /C porous | 85mAh g <sup>-1</sup> at 10C             | 70mAh g <sup>-1</sup> after 120 cycles at 10C    | S4               |
| NTP Nanocubes with Synergistic Coating of Carbon and Rutile TiO <sub>2</sub>                 | 86 mAh g <sup>-1</sup> at 5C             | 77.8 mAh g <sup>-1</sup> after 2000 cycles at 5C | S5               |

- S1. J. Song, S. Park, J. Gim, V. Mathew, S. Kim, J. Jo, S. Kim and J. Kim, *J. Mater. Chem. A*, 2016, **4**, 7815-7822.
- S2. C. Wu, P. Kopold, Y. Ding, P. Aken, J. Maier, Y. Yu, *ACS Nano*, 2015, **9** (6), 6610–6618.
- S3. B. Zhao, Q. Wang, S. Zhang and C. Deng, *J. Mater. Chem. A*, 2015, **3**, 12089-12096.
- S4. Z. Huang, L. Liu, L. Yi, W. Xiao, M. Li, Q. Zhou, G. Guo, X. Chen, H. Shu, X. Yang, X. Wang, *J. Power Sources*, 2016, **325**, 474-481.
- S5. J. Yang, H. Wang, P. Hu, J. Qi, L. Guo, L. Wang, *Small*, 2015, **11**, 3744-3749.
